# Supplementary material
Source: Springer Nature journal article supplement (https://www.springermedizin.de/resource/supplementary/12874_2005_123_MOESM2_ESM.pdf/9433820)

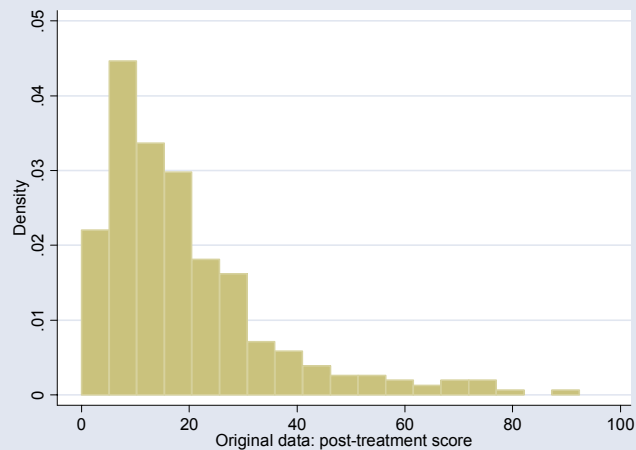

2a

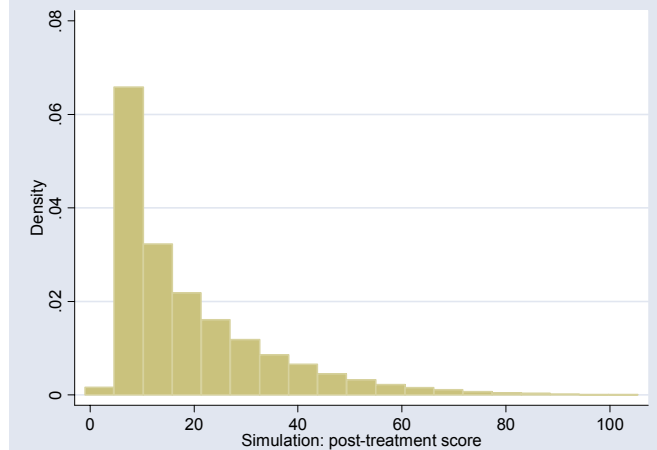

2b

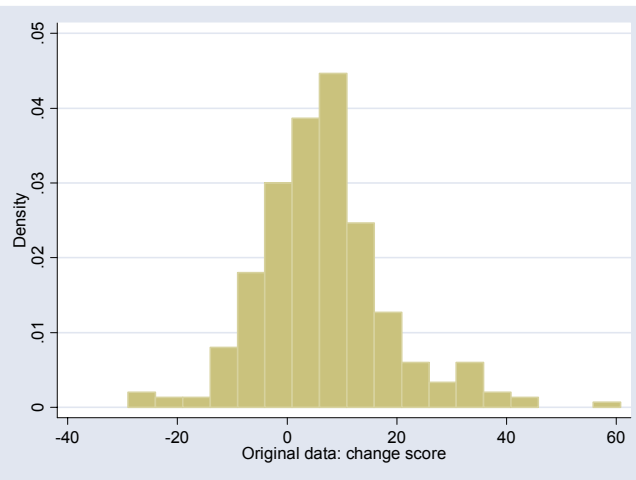

2c

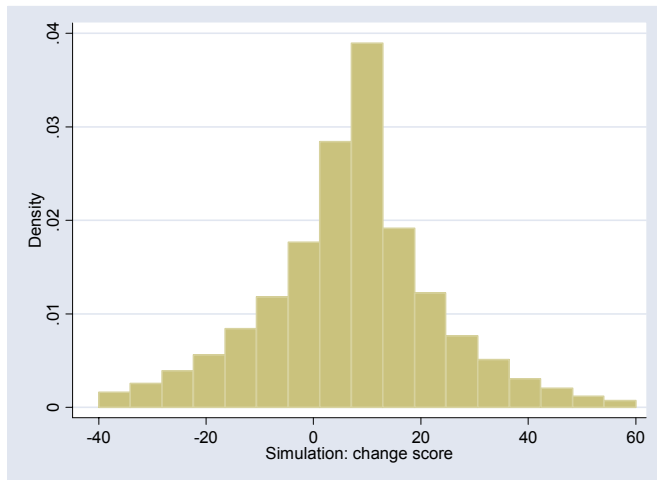

2d

Supplement: MOESM2 [file 9433820]
